# Supplementary material
Source: Research Square preprint supplement (doi:10.21203/rs.3.rs-9037759/v1)
Supplement: Supplementary file 1 [file 43ae224daff09b8d09bebec0.docx]

**Computational design and immunoinformatic validation of a multistage mRNA vaccine candidate against *Mycobacterium tuberculosis***

**Manika Sharma1, Parul Bhatt1,** **Kiran Bharat Lokhande2, Shailendra Asthana2**

**Medha Singh,# Monika Sharma1, Sadhna Sharma***

**Supplementary Data**

**Supplementary F1- Sequence similarity with the human genome –** Using NCBI blastp, the designed vaccine predicted no sequence similarity with the human genome proteins.

| Expression Stage | Protein name | Antigenic Score | Proinflammatory Score |
| --- | --- | --- | --- |
| **Early Expressing Antigens** | **CFP10** | **0.7826** | **0.6768** |
| **MPT-64** | **0.6006** | **0.7045** |
| Ag85B | 0.5842 | 0.7375 |
| **ESAT-6** | **0.5577** | **0.6972** |
| PPE18 | 0.4625 | 0.6872 |
| TB18.5 | 0.4263 | 0.7202 |
| **Mce4F** | **0.4823** | **0.7088** |
| **Mce4A** | **0.3984** | **0.7202** |
| **Constitutive Expressing Antigens** | **Wag22** | **2.0041** | **0.4011** |
| Rv1803c | 1.9060 | 0.4824 |
| Rv1818c | 1.6972 | 0.4632 |
| Rv2315 | 0.4572 | 0.7147 |
| **Late Expressing Antigens** | **Rv1733c** | **0.4655** | **0.7267** |
| **Rv1738** | **0.5034** | **0.7413** |
| **Rv2006** | **0.5483** | **0.7191** |
| Rv2032 | 0.3631 | 0.6511 |
| Rv2627 | 0.2374 | 0.7409 |
| Rv2628 | 0.5355 | 0.7655 |

**Table S1. Selection of proteins for designing mRNA vaccine-**The early expressing proteins incorporated in our vaccine includes CFP10, ESAT-6, MPT64 Mce4A and Mce4F. Two late expressing proteins were selected from DosR family; Rv1738 and Rv1733c and one from Glycosyl hydrolases family 65 otsb1 (Rv2006). WAG22 (Rv1759c) was chosen from the constitutive expressing PE-PGRS family. All these proteins(yellow highlighted) are scoring good antigenic and pro-inflammatory score.

| **Server** | **Parameter** | **Mce4A** |  | **Rv3875** | **Rv3874** | **Rv1980c** | **Rv2006** | **Rv1733c** | **Rv1738** | **Rv1759c** |
| --- | --- | --- | --- | --- | --- | --- | --- | --- | --- | --- |
| NetMHC4.0  [Prediction of MHC Class I binders] | **No. of overlapping nonamers** | 392 |  | 87 | 92 | 220 | 1319 | 202 | 86 | 906 |
| **Total no. of binding Epitopes** | 245 |  | 45 | 41 | 245 | 845 | 128 | 56 | 232 |
| **Total no. of Promiscuous epitopes** | 108 |  | 23 | 20 | 153 | 597 | 80 | 33 | 109 |
| **No. of promiscuous antigenic epitopes** | 77 |  | 15 | 16 | 77 | 320 | 43 | 17 | 72 |
| IEDB [Prediction of MHC Class II binders] | **No. of overlapping nonamers** | 392 |  | 87 | 92 | 220 | 1319 | 202 | 86 | 906 |
| **Total no. of binding Epitopes** | 116 |  | 15 | 14 | 50 | 325 | 53 | 18 | 101 |
| **Total no. of Promiscuous epitopes** | 26 |  | 2 | 1 | 11 | 179 | 13 | 4 | 14 |
| **No. of promiscuous antigenic epitopes** | 8 |  | 2 | 1 | 3 | 94 | 5 | 2 | 7 |
| NetMHC4.0  And IEDB | **Overlapping**  **(MHC I and II)Promiscuous antigenic epitopes** | 7 |  | 2 | - | - | 25 | 3 | 2 | 7 |

**Table S2. Prediction based results of promiscuous antigenic epitopes from selected stage specific Mtb proteins**- Mce4F generated more overlapping nonamers than Mce4A because of its large size. Using NETMHC4.0, both of these proteins generated same number of MHC class I restricted epitopes, promiscuous epitopes and promiscuous antigenic epitopes. Using IEDB server, Mce4F generated more MHC class II restricted epitopes as well as promiscuous antigenic epitopes than Mce4A. Rv2006 protein generated maximum number of overlapping nonamers as well as promiscuous antigenic epitopes, among all the seven proteins whereas Rv3875 generated least number of binding epitopes for both MHC class I and II. Common promiscuous epitopes for MHC class I and class II were numerous in Rv2006 and Rv1759c whereas Rv3874 and 1980c generated no common promiscuous antigenic epitope.

| **Proteins** | **Epitopes** | **Vaxijen Score** | **Pro-inflammatory** | **Anti-inflammatory** | **No. of Binders**  **MHCclass I(I) and MHC class II(II)** | **Class I Alleles** | **Class II Alleles** |
| --- | --- | --- | --- | --- | --- | --- | --- |
| Rv3874 | EMKTDAATL | 1.282 | 0.4753 | 0.3814 | I=10,II=0 | HLA-A*02:50 , HLA-A*25:01, HLA-B*08:01, HLA-B*08:02, HLA-B*08:03 , HLA-B*15:03 , HLA-B*15:09, HLA-B*35:03, HLA-B*39:01, HLA-C*04:01 , HLA-C*07:02, HLA-C*14:02, HLA-E*01:01 | - |
| Rv3875 | MTEQQWNFA | 0.6826 | 0.5065 | 0.3628 | I=7,II=0 | HLA-A*01:01, HLA-A*30:01, HLA-A*66:01, HLA-A*68:02, HLA-A*68:23, HLA-A*69:01, HLA-C*05:01 |  |
| Rv1980c | TSVRVAAAL | 0.82 | 0.6328 | 0.5209 | I=16,II=0 | HLA-A*26:02, HLA-A*68:02, HLA-A*69:01, HLA-B*15:09, HLA-B*42:01, HLA-B*46:01, HLA-B*48:01, HLA-B*57:01, HLA-B*58:01, HLA-C*03:03, HLA-C*14:02, HLA-C*15:02 |  |
|  | YNINISLPS | 1.6693 | 0.6008 | 0.5349 | I=0 ,II=7 |  | HLA-DRB1*04:01, HLA-DRB1*09:01, HLA-DRB1*04:05, HLA-DRB1*04:04, HLA-DRB1*12:01, HLA-DRB1*13:02, HLA-DRB1*15:01 |
| Rv2006 | LSAVVHAWV | 0.5624 | 0.5642 | 0.5163 | I= 6 ,II=3 | HLA-A*68:02, HLA-A*69:01, HLA-B*15:17, HLA-B*58:01, HLA-C*05:01, HLA-C*15:02 | HLA-DRB1*09:01, HLA-DRB1*01:01, HLA-DRB1*07:01 |
|  | YRQLSSQHL | 0.6968 | 0.573 | 0.3535 | I= 13 , II=10 | HLA-B*08:03, HLA-B*14:02, HLA-B*15:03, HLA-B*15:09, HLA-B*27:05, HLA-B*27:20, HLA-B*39:01, HLA-B*48:01, HLA-B*73:01, HLA-C*06:02, HLA-C*07:01, HLA-C*07:02, HLA-C*14:02 | HLA-DRB1*01:01, HLA-DRB1*07:01, HLA-DRB1*09:01, HLA-DRB1*11:01, HLA-DRB1*15:01, HLA-DRB5*01:01, HLA-DRB4*01:01, HLA-DRB1*04:01, HLA-DRB1*04:04, HLA-DRB1*04:05 |
| Rv1738 | IEAVTHQPA | 0.4704 | 0.5346 | 0.4512 | I=4,II=3 | HLA-B*40:02, HLA-B*45:01, HLA-B*18:01, HLA-B*40:01 | HLA-DRB4*01:01, HLA-DRB1*08:02, HLA-DRB1*09:01 |
|  | VLQHWTVDI | 0.6122 | 0.5447 | 0.4209 | I=13,II=0 | HLA-A*02:19 , HLA-C*07:01, HLA-C*08:02, HLA-A*02:01, HLA-A*02:03, HLA-A*02:05, HLA-A*02:11, HLA-A*02:12, HLA-A*02:16, HLA-A*02:17 , HLA-A*02:50 , HLA-A*32:01, HLA-A*32:01, HLA-A*32:07 |  |
| Rv1733c | IADAALAAL | 0.4038 | 0.5186 | 0.4651 | I=13,II=0 | HLA-A*02:06,  HLA-A*69:01,  HLA-B*14:02,  HLA-B*15:09,  HLA-B*35:01 , HLA-B*35:03,  HLA-B*39:01,  HLA-B*48:01,  HLA-C*03:03,  HLA-C*05:01,  HLA-C*08:02,  HLA-C*12:03,  HLA-C*15:02 |  |
|  | ATSAPPRTK | 0.8273 | 0.5278 | 0.4047 | I=3,II=0 | HLA-A*03:01, HLA-A*11:01, HLA-A*30:01 |  |
| Rv1759c | YAAAEAAAV | 0.6356 | 0.5149 | 0.5 | I=23,II=5 |  | HLA-DRB1*01:01, HLA-DRB1*04:01, HLA-DRB1*07:01, HLA-DRB1*09:01, HLA-DRB5*01:01 |
|  | EAAAVTPLL | 0.5504 | 0.5670 | 0.5442 | I=16,II=1 | HLA-A*26:01, HLA-A*26:02, HLA-A*66:01, HLA-A*66:01, HLA-A*68:02, HLA-A*68:23, HLA-A*69:01, HLA-B*14:02, HLA-B*35:01, HLA-B*39:01, HLA-B*48:01, HLA-B*51:01, HLA-B*53:01, HLA-B*58:01, HLA-C*03:03, HLA-C*04:01, HLA-E*01:01 | HLA-DRB1*01:01 |
| Mce4A | VQLEVNTLF | 0.6468 | 0.6243 | 0.4442 | I=17  II=3 | HLA-A*02:06,HLA-A*23:01,HLA-A*24:02,HLA-A*32:01,HLA-A*32:07,HLA-A*66:01,  HLA-B*08:03,HLA-B*15:01,HLA-B*15:02,HLA-B*15:03,HLA-B*18:01,HLA-B*38:01,  HLA-B*40:13,HLA-B*48:01,HLA-B*58:02,  HLA-C*04:01,HLA-C*05:01 | HLA-DRB1*03:01,  HLA-DRB1*04:04,  HLA-DRB1*04:01 |
|  | TSVRVAAAL | 0.82 | 0.5945 | 0.5209 | I=16  II=0 | HLA-A*26:02, HLA-A*68:02, HLA-A*69:01, HLA-B*08:02, HLA-B*14:02, HLA-B*15:09, HLA-B*15:17, HLA-B*39:01, HLA-B*42:01¸ HLA-B*46:01, HLA-B*48:01, HLA-B*57:01, HLA-B*58:01, HLA-C*03:03, HLA-C*14:02, HLA-C*15:02 | - |
|  | RQANPKLPA | 1.1125 | 0.5543 | 0.3791 | I=8  II=0 | HLA-A*02:06, HLA-A*66:01, HLA-B*15:01, HLA-B*15:03, HLA-B*27:20, HLA-B*40:13, HLA-B*48:01, HLA-B*83:01 | - |
| Mce4F | FPALAASLA | 0.793 | 0.5358 | 0.5209 | I=9  II=6 | HLA-B*07:02, HLA-B*15:09, HLA-B*35:01, HLA-B*35:03, HLA-B*39:01, HLA-B*42:01, HLA-B*51:01, HLA-B*54:01, HLA-B*83:01 | HLA-DRB1*01:01, HLA-DRB1*09:01, HLA-DRB1*04:04, HLA-DRB1*08:02, HLA-DRB1*04:01, HLA-DRB1*04:05, HLA-DRB1*01:01,HLA-DRB1*09:01, HLA-DRB1*04:04 |
|  | LLVVFPALF | 2.1352 | 0.5332 | 0.5209 | I=8  II=9 | HLA-A*23:01, HLA-A*29:02, HLA-B*08:02, HLA-B*08:03, HLA-B*15:01, HLA-B*15:02, HLA-B*15:03, HLA-B*58:01 | HLA-DRB1*08:02, HLA-DRB1*01:01, HLA-DRB1*09:01, HLA-DRB1*04:05, HLA-DRB1*07:01, HLA-DRB1*04:01, HLA-DRB1*15:01, HLA-DRB1*12:01, HLA-DRB5*01:01 |
|  | LVVFPALFA | 1.5953 | 0.4998 | 0.4256 | I=3  II=4 | HLA-A*66:01, HLA-A*68:02, HLA-A*69:01 | HLA-DRB1*04:04, HLA-DRB1*09:01, HLA-DRB1*08:02, HLA-DRB1*04:01 |

**Table S3. Characteristics of shortlisted epitopes used for vaccine designing**- Predicted binding of 18 promiscuous antigenic epitopes with MHC Class I and MHC Class II along with their vaxijen score, pro-inflammatory score and anti-inflammatory score. Peptide ‘YRQLSSQHL’ of Rv2006 was found to bind with maximum 13 MHC Class I alleles and 10 MHC Class II alleles.


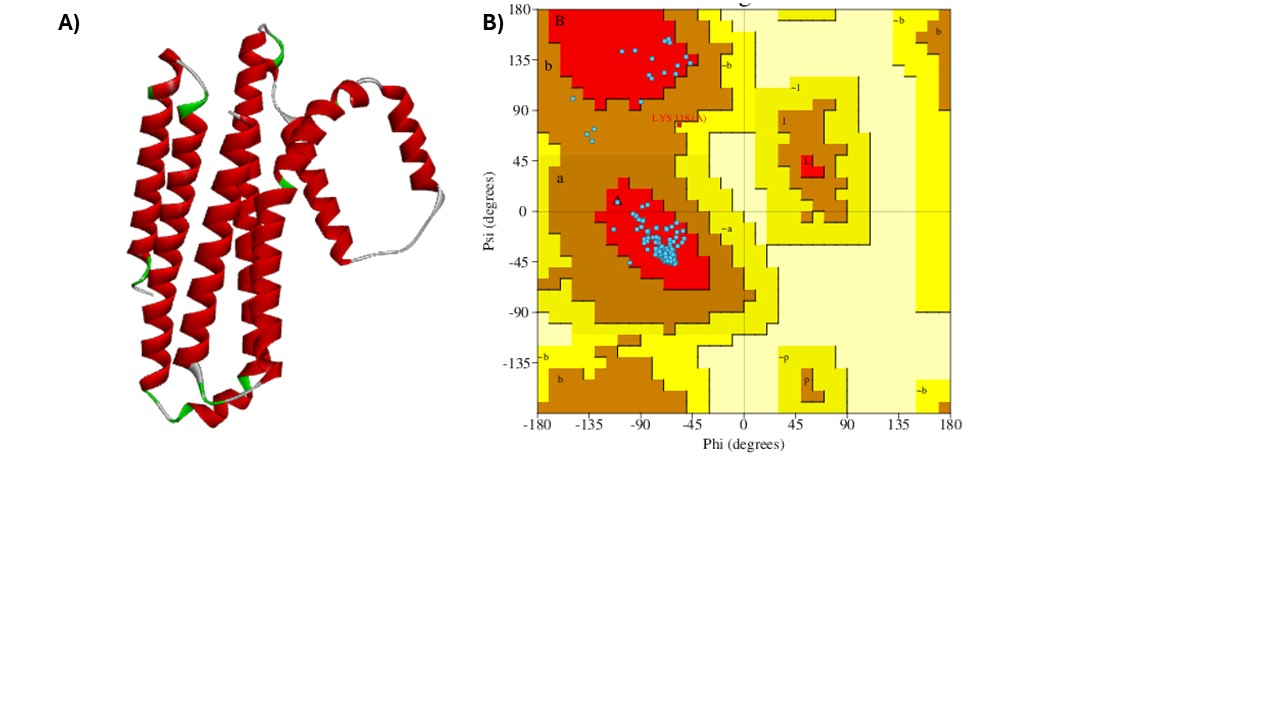


**Supplementary F2- Homology Modelling using AlphaFold server-** A) Visualization of 3Dmodel structure of vaccine construct where red regionrepresents the helical region, green represents the β sheet and the grey color represents the coil area. B) Ramachandran plot of the selected model of vaccine construct.

| **Characteristics** | **Multiple Protein Profiler1.0** | **ExPaSy Protparam** |
| --- | --- | --- |
| **Length** | 232 | 232 |
| **GRAVY** | 0.6 | 0.6 |
| **Aliphatic Index** | 110.69 | 110.69 |
| **Instability Index** | 30.56 | 30.56 |
| **Stability** | Stable | Stable |
| **Molecular Weight** | 24592.37 | 24592.37 |
| **Aromaticity** | 0.13 | - |
| **Isoelectric Point** | 9.38 | 9.38 |
| **Charge at pH 7** | 7.07 | - |
| **Secondary Structure Fraction (helix, turn, sheet)** | [0.35, 0.12, 0.47] | - |

**Table S4. Physicochemical properties of designed vaccine**- The scores obtained from both Multiple Protein Profiler 1.0 and the ExPASy ProtParam server for GRAVY, aliphatic index, instability index, theoretical isoelectric point (pI), and molecular weight were identical.

| **Vaccine Residue** | **TLR type** | **TLR Residue** | **Bond type** | **LRR region** | **Vaccine Residue Interacted** |
| --- | --- | --- | --- | --- | --- |
| Glu216 | TLR2 | Arg155 | H- Bond;Electrostatic | LRR5 | Rv1759c |
| Asp120 | TLR2 | Lys347 | Electrostatic | - | Rv3874 |
| Tyr211 | TLR2 | Ser60 | H- Bond | LRR1 | AAY Linker |
| Ala219 | TLR2 | Tyr109 | H- Bond | LRR3 | Rv1759c |
| Tyr212 | TLR2 | Arg155 | H- Bond | LRR5 | Rv1759c |
| Tyr223 | TLR2 | Ser184 | H- Bond | LRR6 | AAY Linker |
| Tyr127 | TLR2 | Lys422 | H- Bond | LRR15 | AAY Linker |
| Gln2 | TLR2 | Arg447 | H- Bond | LRR16 | Mce4A |
| His179 | TLR2 | Asn258 | H- Bond | LRR9 | Rv1738 |
| Tyr211 | TLR2 | Asp58 | H- Bond | LRR1 | AAY Linker |
| Tyr223 | TLR2 | Asp231 | H- Bond | - | AAY Linker |
| Tyr151 | TLR2 | Lys37 | H- Bond;Electrostatic | - | AAY Linker |
| Tyr187 | TLR2 | Arg257 | Electrostatic | LRR9 | AAY Linker |
| His179 | TLR2 | Asn258 | H-Bond | LRR9 | Rv1738 |
| Phe64 | TLR2 | Gln396 | H-bond | LRR14 | Mce4F |
| Tyr223 | TLR2 | Met159 | Hydrophobic | LRR5 | AAY Linker |
| Val148 | TLR2 | Lys37 | Hydrophobic | - | Rv2006 |
| Val182 | TLR2 | Arg316 | Hydrophobic | LRR11 | Rv1738 |
| Ala150 | TLR2 | Lys37 | Hydrophobic | - | Mce4F |
| Ala226 | TLR2 | Met159 | Hydrophobic | LRR5 | Rv1759c |
| Ala219 | TLR2 | Tyr109 | Hydrophobic | LRR3 | Rv1759c |
| Ala222 | TLR2 | Tyr109 | Hydrophobic | LRR3 | AAY linker |
| Val176 | TLR2 | His318 | Hydrophobic | LRR11 | Rv1738 |
| Leu177 | TLR2 | His318 | Hydrophobic | LRR11 | Rv1738 |
| Tyr151 | TLR2 | Lys37 | Hydrophobic | - | AAY linker |
| Thr119 | TLR4 | Val32 | H-bond | LRR2 | Rv3874 |
| Lys208 | TLR4 | Gly267 | H-bond | LRR11 | Rv1733c |
| Lys208 | TLR4 | Asn268 | H-bond | LRR11 | Rv1733c |
| Tyr104 | TLR4 | His552 | H-bond | LRR23 | Rv1980c |
| Lys208 | TLR4 | Asp294 | H-bond/ Electrostatic | LRR12 | Rv1733c |
| Tyr212 | TLR4 | Phe263 | Hydrophobic | LRR11 | Rv1759c |
| Leu232 | TLR4 | Phe500 | Hydrophobic | LRR21 | Rv1759c |
| Tyr212 | TLR4 | Leu293 | Hydrophobic | LRR12 | Rv1759c |

**Table S5. TLR2 and TLR4 specified LRR regions interaction of the designed vaccine** -Our designed vaccine residues show strong interaction with TLR2 and TLR4 involving hydrogen bond(H-bond), electrostatic and hydrophobic bond. Most of the interactions involved hydrogen bonding. Various LRRs regions were also analysed in which TLR2 involve 19 LRR regions and TLR4 involve 8 LRR regions specified interactions. Selected epitopes involved in interaction were also identified.


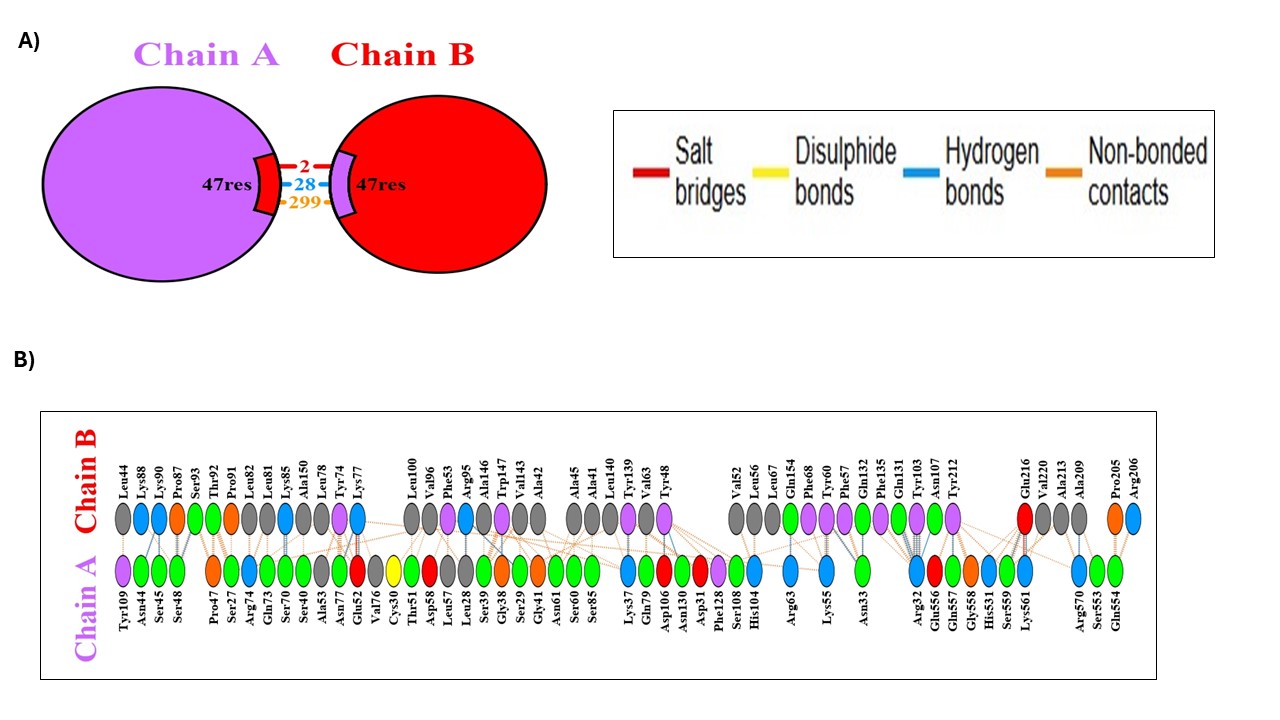


**Supplementary F3. Interactions obtained via translated vaccine with TLR2- A)Chain A represents the receptor(TLR2) and Chain B represents the Ligand(translated vaccine). The interactions includes 28 hydrogen bonds(blue), two salt bridges(red) and 299 non-bonded contacts(orange). Out of total residues 47 residues are involved in generating interactions. B) Represents the interactions between the amino acids of chain A( TLR2) and chain B(translated vaccine).**


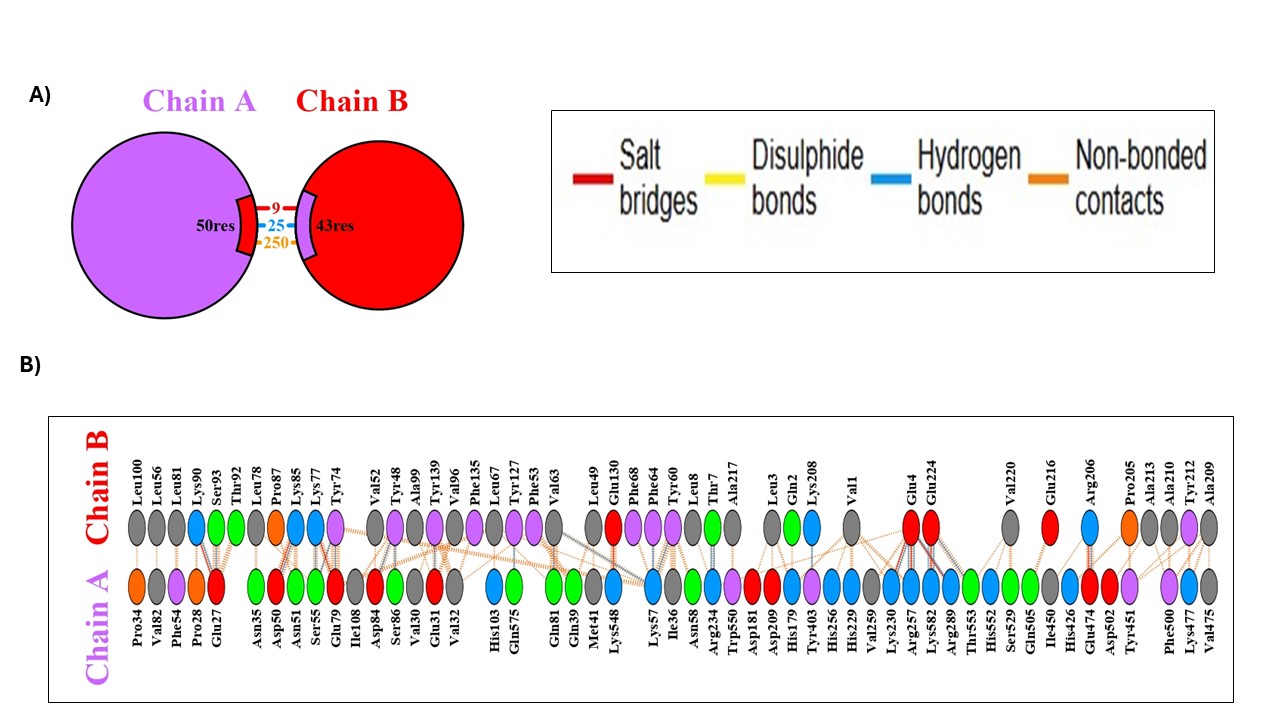


**Supplementary F4. Interactions obtained via translated vaccine with TLR4- A)Chain A represents the receptor(TLR4) and Chain B represents the Ligand(translated vaccine). The interactions includes 25 hydrogen bonds(blue), 9 salt bridges(red) and 250 non-bonded contacts(orange). Of total residues, 50 residues of TLR4 and 43 residues of translated vaccine are involved in generating interactions. B) Represents the interactions between the amino acids of chain A( TLR4) and chain B(translated vaccine).**
